# Supplementary figures and images for: Non-linear developmental trajectory of electrical phenotype in rat substantia nigra pars compacta dopaminergic neurons
Source: eLife journal article supplement (doi:10.7554/elife.04059), 2014-10-20

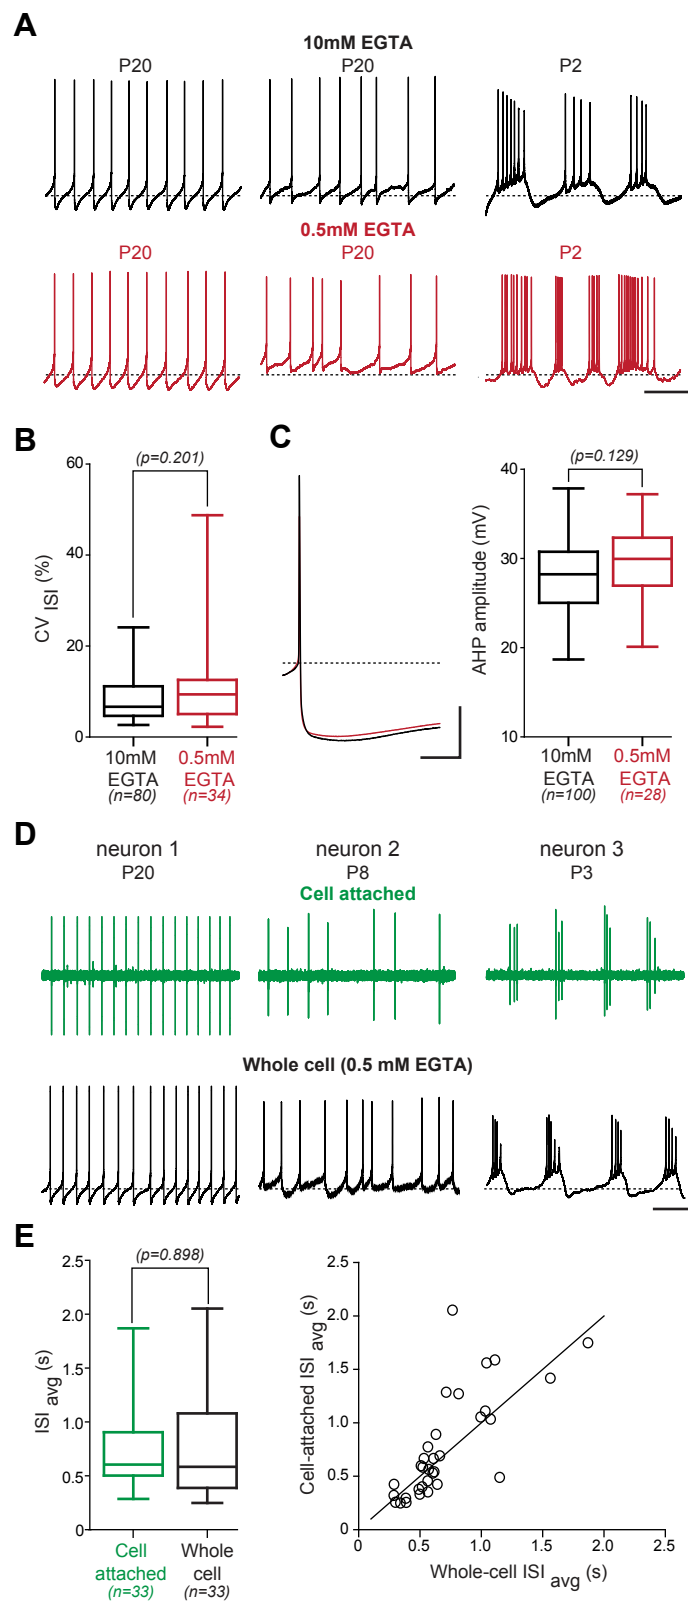

**FIGURE 2 Suppl.**

Supplement: supp [file elife-04059-supp-v1.zip]

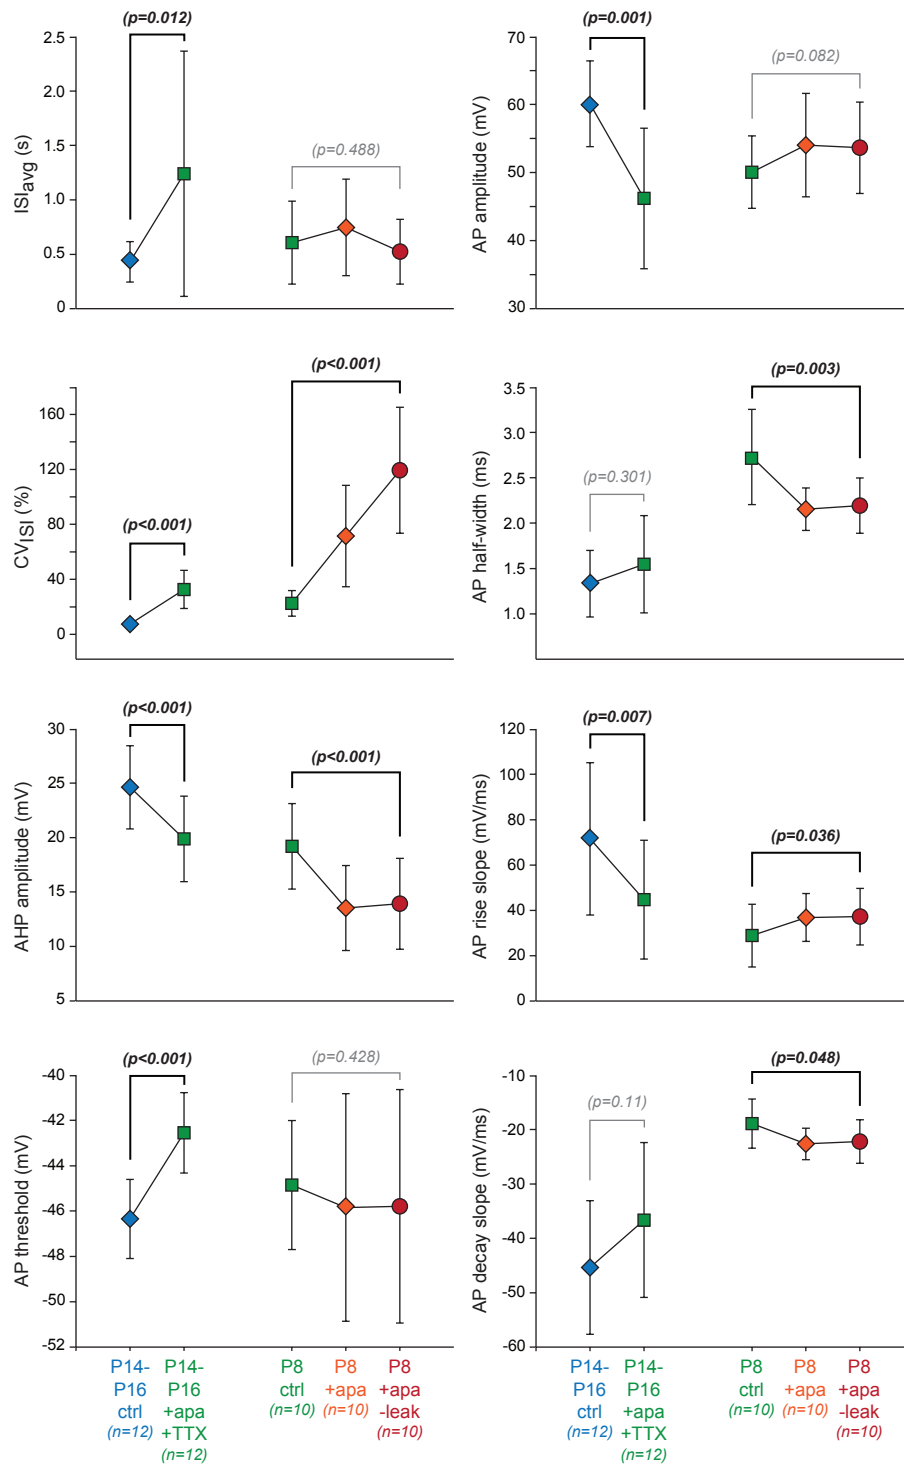

**FIGURE 10 Suppl.**

Supplement: supp [file elife-04059-supp-v1.zip]
